# Supplementary material for: Clinical Assessment of a Novel Recombinant Simian Adenovirus ChAdOx1 as a Vectored Vaccine Expressing Conserved Influenza A Antigens
Source: PubMed Central journal article supplement — Mol Ther. 2014 Jan 21;22(3):668–74. doi: 10.1038/mt.2013.284 (PMC3944330; doi:10.1038/mt.2013.284), 2014-01-21
Supplement: mt2013284x1.pdf [file mt2013284x1.pdf]

**Table.1. Study Design**

|                                   | <b>Group 1</b> | <b>Group 2</b> | <b>Group 3</b> | <b>Group 4</b> |
|-----------------------------------|----------------|----------------|----------------|----------------|
| <b>Group size</b>                 | 3              | 3              | 3              | 6              |
| <b>Dose of ChAdOx1 NP+M1 (vp)</b> | 5.00E+08       | 5.00E+09       | 2.50E+10       | 5.00E+10       |
| <b>Median age</b>                 | 26             | 26             | 42             | 21             |
| <b>No. of females</b>             | 3/3            | 1/3            | 2/3            | 4/6            |

Demographics and dose of vaccine administered to volunteers.
