# Supplementary material for: Clinical Assessment of a Novel Recombinant Simian Adenovirus ChAdOx1 as a Vectored Vaccine Expressing Conserved Influenza A Antigens
Source: PubMed Central journal article supplement — Mol Ther. 2014 Jan 21;22(3):668–74. doi: 10.1038/mt.2013.284 (PMC3944330; doi:10.1038/mt.2013.284), 2014-01-21

**Supplemental Figure 1. Breadth of ex vivo IFN- $\gamma$  ELISPOT responses to NPM1 peptide pools following dose-escalation vaccination with ChAdOx1-NPM1.** (A) Stacked bar graph showing IFN- $\gamma$  ELISpot responses from vaccinated volunteers at baseline (day 0) and days 14 and 21. Volunteers #403, 405 and 408 received  $5 \times 10^8$  vp, volunteers #406, 401 and 404 received  $5 \times 10^9$  vp, volunteers #413, 411 and 407 received  $2.5 \times 10^{10}$  vp and volunteers #415, 416, 412, 421, 417, 422 received  $5 \times 10^{10}$  vp. Negative control was cells stimulated with R10 alone.

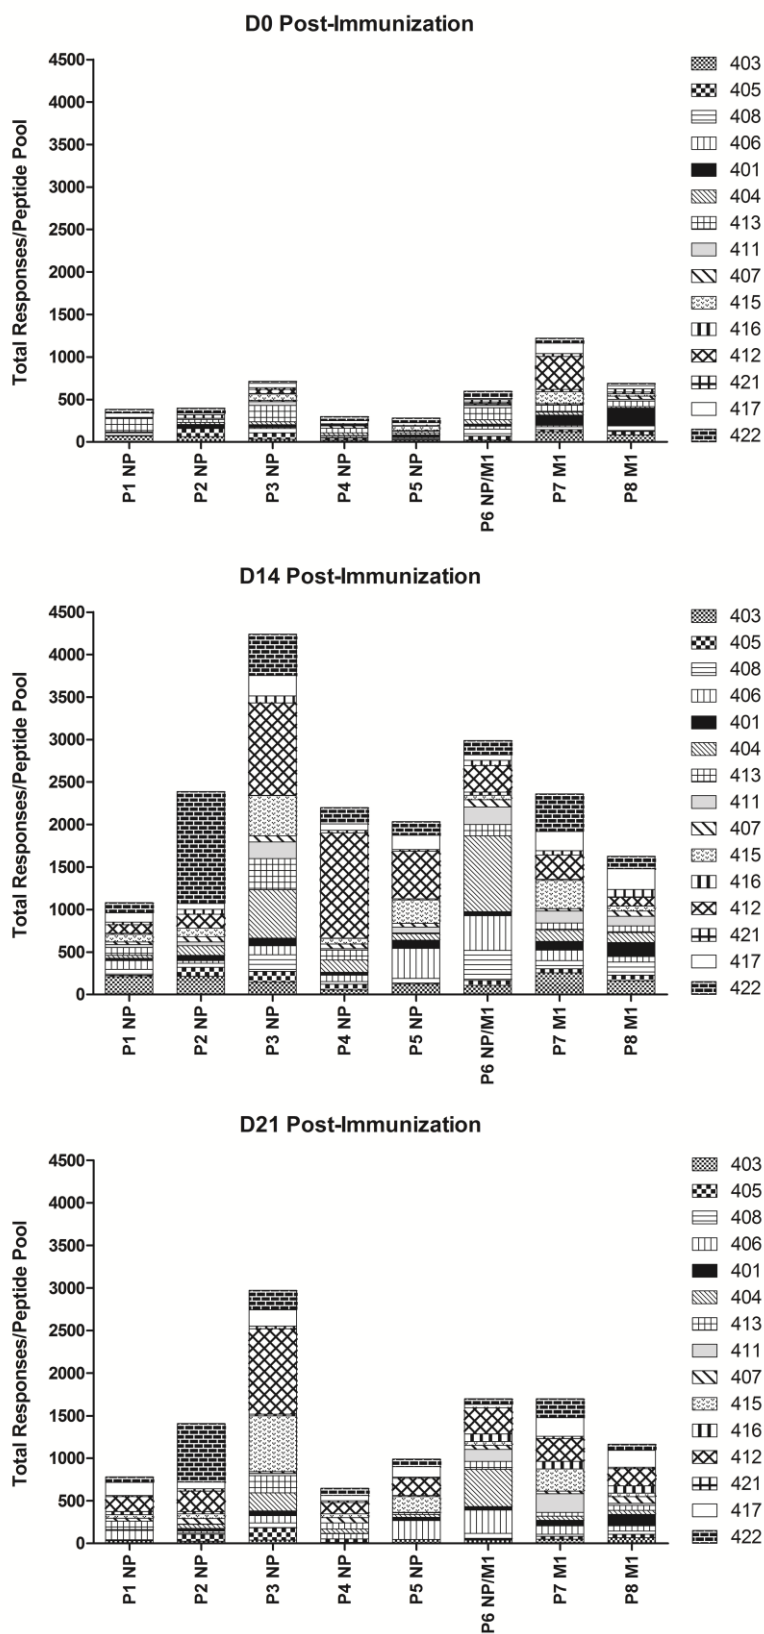

Supplement: mt2013284x2.pdf [file mt2013284x2.pdf]
