# Supplementary material for: Clinical Assessment of a Novel Recombinant Simian Adenovirus ChAdOx1 as a Vectored Vaccine Expressing Conserved Influenza A Antigens
Source: PubMed Central journal article supplement — Mol Ther. 2014 Jan 21;22(3):668–74. doi: 10.1038/mt.2013.284 (PMC3944330; doi:10.1038/mt.2013.284), 2014-01-21

**Supplemental Figure 2. Breadth of *ex vivo* IFN- $\gamma$  ELISPOT responses to NPM1 peptide pools following MVA-NP+M1 boost.** (A) Median and individual *ex vivo* IFN- $\gamma$  ELISpot responses from vaccinated volunteers at Boost (day 0) and days 7, 21 and 56 post-boost. Negative control was cells stimulated with R10 alone. SFU/ $10^6$  PBMCs = spot forming units per  $10^6$  peripheral blood mononuclear cells.

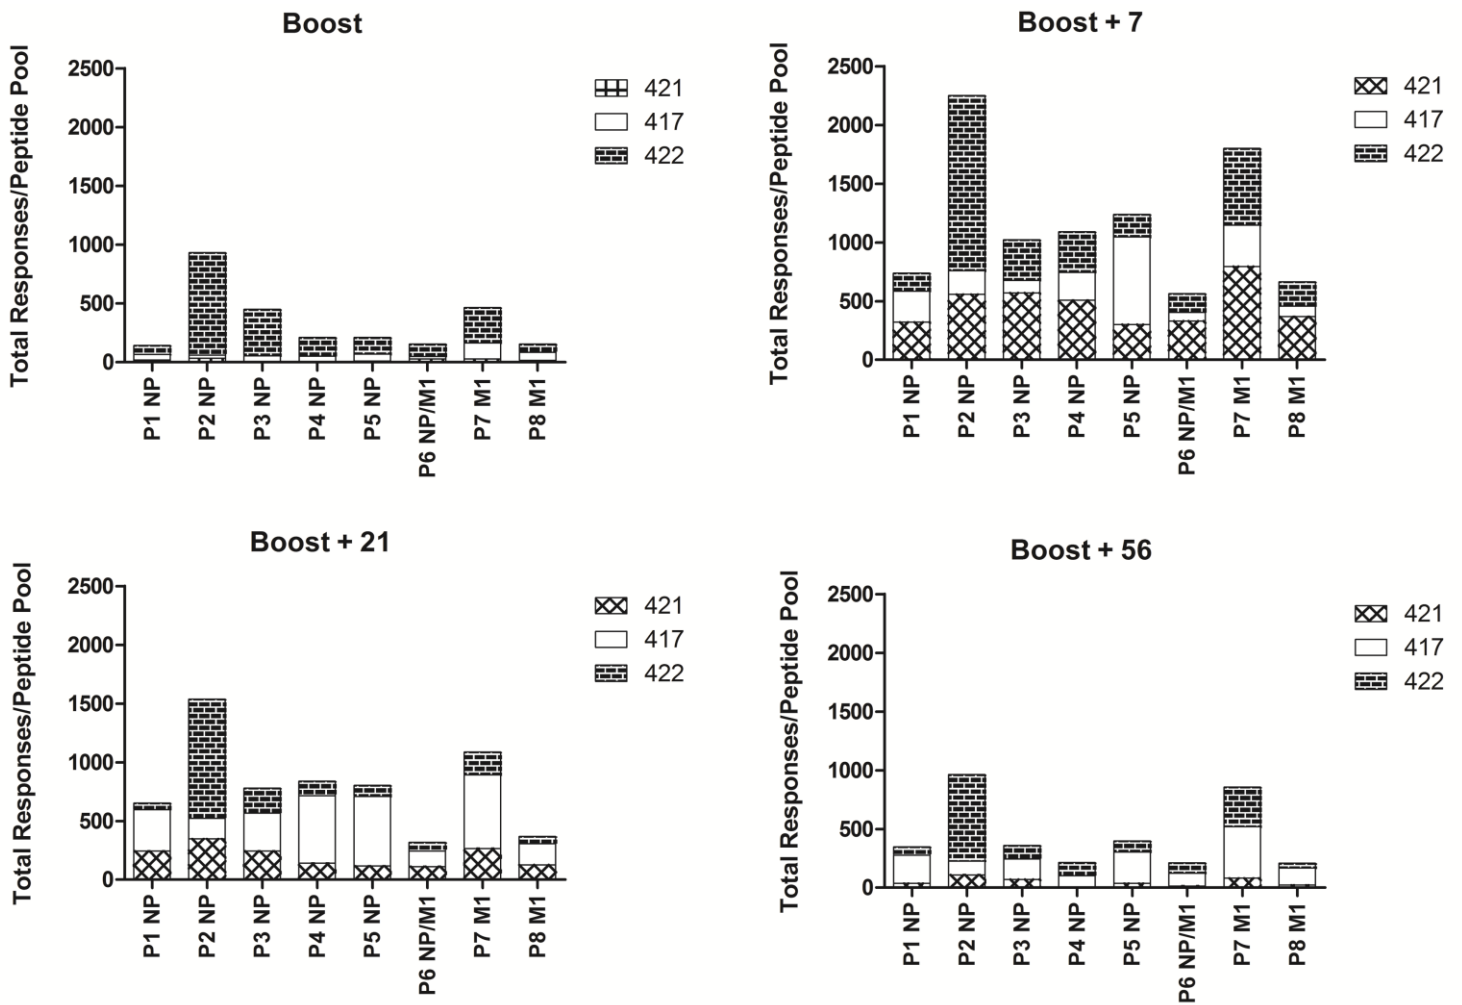

Supplement: mt2013284x3.pdf [file mt2013284x3.pdf]
